# Supplementary material
Source: publisher site journal article supplement (https://www.oncotarget.com/article/28499)
Supplement: Supplementary file 1 [file 28499]

## Addendum

**Addendum: Early-onset pancreatic cancer: a review of molecular mechanisms, management, and survival****Mark B. Ulanja<sup>1</sup>, Alastair E. Moody<sup>2</sup>, Bryce D. Beutler<sup>3</sup>, Daniel Antwi-Amoabeng<sup>1</sup>, Ganiyu A. Rahman<sup>4</sup> and Olatunji B. Alese<sup>5</sup>**<sup>1</sup>Christus Ochsner Saint Patrick Hospital, Lake Charles, LA 70601, USA<sup>2</sup>Department of Anesthesiology, University of Utah, Salt Lake City, UT 84112, USA<sup>3</sup>Department of Radiology, University of Southern California, Keck School of Medicine, Los Angeles, CA 90033, USA<sup>4</sup>Department of Surgery, University of Cape Coast, School of Medical Sciences, Cape Coast, Ghana<sup>5</sup>Department of Hematology and Oncology, Winship Cancer Institute, Emory University, Atlanta, GA 30322, USA**Published:****Copyright:** © 2023 Ulanja et al. This is an open access article distributed under the terms of the [Creative Commons Attribution License](#) (CC BY 4.0), which permits unrestricted use, distribution, and reproduction in any medium, provided the original author and source are credited.**This article has an addendum:** No funding was used for this publication.Original article: Oncotarget. 2022; 13:828–841. <https://doi.org/10.18632/oncotarget.28242>
